# Livestock market data for modeling disease spread among US cattle

Ian T. Carroll<sup>\*1,2</sup> and Shweta Bansal<sup>1,2</sup>

<sup>1</sup>*Department of Biology, Georgetown University, Washington, DC, USA*

<sup>2</sup>*Fogarty International Center, National Institutes of Health, Bethesda, MD, USA*

September 25, 2015

## Abstract

2 Transportation of livestock carries the risk of spreading foreign animal diseases  
throughout a susceptible population, leading to costly public and private sector  
4 expenditures on disease containment and eradication. Individual animal tracing  
systems that exist in countries other than the US have allowed epidemiologists  
6 and veterinarians in those countries to model the risks engendered by livestock  
movement and prepare responses designed to protect the livestock industry. Within  
8 the US, data on livestock movement is not sufficient for direct parameterization of  
disease models, but network models that assimilate limited data provide a path  
10 forward in model development to inform preparedness for disease outbreaks in the  
US. Here, we report on a novel data stream, the information publicly reported by US  
12 livestock markets on the origin of cattle consigned at live-auctions, and demonstrate  
such potential. By aggregating weekly auction reports from markets in several  
14 states, some spanning multiple years, we obtain an ego-centric sample of edges  
from the dynamic cattle transportation network in the US. We first demonstrate  
16 how the sample might be used to infer shipments to unobserved livestock markets  
in the US, although we find the assumptions of edge prediction by generalized linear  
18 models too restrictive. The sample itself, however, can still be used to parameterize  
simplified disease models; which we use to demonstrate that the temporal resolution  
20 of the data is sufficient to reveal seasonal trends in the risk of disease outbreaks. We  
conclude that future work on statistical models for dependence between edges will  
22 improve the inference of a complete cattle movement network model from market  
data, one able to address the capacity of markets to spread or control livestock  
24 disease.

---

\*Corresponding author: *itc2@georgetown.edu*

## Author Summary

26 We have “crowd-sourced” the collection of previously unavailable cattle movement  
27 data, benefiting from buyers interest in the origins of cattle sold at live-auction  
28 markets, to implement a minimum level of movement surveillance. Using our novel  
29 dataset, we demonstrate potential to infer a complete dynamic transportation net-  
30 work and model national-scale livestock epidemics.

## Introduction

32 Livestock operations within the United States (US) must be vigilant against trans-  
33 boundary animal diseases, including the critical threat to cattle producers posed by  
34 a re-introduction of foot-and-mouth disease [FMD; 1]. The 2001 FMD outbreak  
35 in the United Kingdom (UK) cost their agricultural sector £3 billion, and 5% of the  
36 nation’s 11 million cattle were culled to control the disease [2]. A study on FMD  
37 risk to California’s 5 million beef and dairy cattle predicts economic losses in the  
38 tens of billions of dollars, even for an outbreak artificially terminated at Califor-  
39 nia’s border [3]. The potential impact of a full-blown epidemic in the US, putting  
40 at risk a 90 million strong cattle herd [4], compels us to study the likely patterns  
41 of disease spread from an initially infected cattle operation [5]. Mechanistic mod-  
42 els that incorporate livestock transportation are needed to help guide prevention  
43 and control of FMD-like diseases, which are known to cause massive burdens on  
44 livestock industries, require costly public interventions, raise public health concerns  
45 and impact food security [6].

46 Studies of past livestock epidemics and disease simulations reveal that network  
47 models provide a useful abstraction of data on animal shipments between livestock  
48 operations [7]. Network models typically emphasize heterogeneity in the number of  
49 disease transmitting contacts attributed to infectious nodes, a pattern that emerged  
50 strongly during the initial spread of FMD in the UK’s 2001 epidemic [8] and one  
51 usually absent from simulations where transmission depends on distance alone.  
52 Network representations of cattle trade exist for several European livestock indus-  
53 tries [9–14], where data for model development is generated from animal tracking  
54 systems mandated by the European Parliament [15]. Availability of these data have  
55 allowed for several advances in surveillance and control strategies: for example, (1)  
56 identification of “sentinel” livestock premises projected to become infected early  
57 during an outbreak in Italy [16], (2) validation of risk reduction from the stand-  
58 still rules implemented in the UK after 2001 [17], and (3) evaluation of targeted  
59 movement bans that selectively eliminate network edges based on node centrality  
60 in transportation networks [14]. Network models for the UK cattle production sys-  
61 tem have additionally provided a foundation for livestock transportation strategies  
62 that promise efficient control of *endemic* diseases [18].

63 The US has opted against individual animal tracking in favor of animal disease  
64 traceability, which only requires that a paper trail on individual movements can  
65 be unearthed subsequent to disease detection. With respect to the development of  
66 models for disease prevention and preparation, the traceability principle promotes  
67 inadequate and belated data collection, and is significantly limited compared to the  
68 point-to-point data on individual animal movements that drive models of European

70 systems. In addition, the findings gleaned from epidemiological models based on  
71 European livestock transportation patterns are not transferable to the US due to the  
72 nature and scale of the US industry: the US industry has developed an unparalleled  
73 feedlot system that relies on widely distributed calving and back-grounding farms  
74 to supply the 25 million head sold annually by feeding operations [4], and the US  
75 Department of Agriculture (USDA) census shows that 22% of the US herd are  
76 transported across state lines in a year [19].

77 The best data currently available is maintained by individual state agricultural  
78 agencies, which collect shipment origin and destination locations on interstate cer-  
79 tificates of veterinary inspection (ICVIs) for cattle entering the state. One cattle  
80 transportation network model has been estimated from a 10% sample of year 2009  
81 ICVIs acquired from 48 state agencies [20,21]. The epidemiological network model  
82 constructed from these data [22] represents the state of the art for analysis of a  
83 nation-wide epidemic in the US, but limitations in the underlying data are substan-  
84 tial. Given that on average only 19.2 (SEM 3.1) percent of shipments onto US beef  
85 operations travel over 100 miles [23], shipping within states likely occurs at much  
86 higher rates than shipments documented on ICVIs. Interannual variability in the  
87 transportation network cannot be observed without repeating a major collection  
88 effort, nor can the type of origin or destination facility be determined from ICVIs  
89 alone. Finally, and of most relevance to the present study, ICVIs are not required  
90 for shipments to exempt facilities, including certain federally approved livestock  
91 markets [24].

92 Cattle in the US are commonly sold at live auction markets between stages of  
93 beef or dairy production (Box 1). In year 2007-08 surveys by the USDA, over half of  
94 beef producers sold non-breeding stock at auction markets in the US (60.7% steers,  
95 58.3% cows), with internet auctions and private treaties being the main alternatives  
96 [25]. Dairy contributes fewer US cattle shipments, but cows removed from dairy  
97 operations are also predominantly sent to auction markets or stockyards [21, 26].  
98 Local epidemiological studies have also found direct contacts with livestock markets  
99 prevalent in Colorado and Kansas [27] and California [28]. The economic reality  
100 now, and for the foreseeable future, is that cattle owners regularly buy and sell  
101 cattle at particular stages of production and rely on live-auction markets to obtain  
102 the best price [29,30].

103 In the UK, and quite possibly in other countries with recent outbreaks of non-  
104 endemic FMD [31], livestock markets played a central role in early, rapid expansion  
105 of the 2001 FMD epidemic [8]. The epidemiological importance of livestock markets  
106 arises from their potentially high degree in both contact and epidemic networks—  
107 the same epidemic phenomena airports create as hubs for transmission and spread of  
108 human influenza [32]. When a livestock operation ships infected animals to market,  
109 two processes spread the disease: splitting of the original group of infected animals  
110 among multiple buyers, and transmission to susceptible animals passing through the  
111 same market [33]. Both processes act to give livestock markets high out-degree in  
112 an epidemic network for FMD [8,34], while a less contagious disease would primarily  
113 be affected by splitting up infected animals arriving from one premises. Livestock  
114 markets can also have high in-degree within the contact network, or a large number  
115 of operations from which cattle are sourced [35]. High in-degree markets are a  
116 natural point of surveillance for disease detection; indeed, markets seeking USDA

116 approval are required to provide veterinary inspection of cattle at auction [24].

118 On the premise that transportation of cattle to and from markets is an im-  
portant class of potential disease-transmitting contacts between farms and other  
120 longer-term animal holdings, we studied the potential for data-driven modeling of a  
market-based contact network for infectious livestock disease in the US. To this end,  
122 we collected data on the locations of origin for individual cattle sold at livestock  
markets that publicly share this information as a form of advertising. Because the  
124 data represent an opportunistic sample of livestock transportation, we first report  
basic trends in the data alongside some potential sources of bias in the sample. We  
then demonstrate two methods for inference of a network model of contacts between  
126 livestock operations from these data: (1) using the sample to estimate degree dis-  
tributions of an otherwise random contact network, and (2) fitting coefficients to  
128 covariates that may predict the presence and weight of unobserved network edges.  
The results firmly establish that market-bound cattle shipments are dominated by  
130 intra-state movements, and are consistent with the possibility that transportation  
to markets also drives interstate flows. The daily resolution of this data source  
132 allows detection of sub-annual variation in trade volume and network degree dis-  
tributions, and as a continuously updated data stream creates potential for both  
134 inter-annual trend and recent-event detection. We demonstrate high potential for  
inferring the properties of unobserved edges connected to non-reporting livestock  
136 markets, and conclude with a discussion of the critical gaps for building a complete  
epidemic network model that includes markets acting as hubs for the spread of  
138 livestock disease.

## Methods

### 140 Data Collection

As an integral part of livestock production, stockyards are distributed across all  
142 parts of the US with beef or dairy operations, i.e. throughout the US [Box 1; 36 ].  
Prices obtained at live auction are rapidly publicized to help consignors and buyers  
144 decide when and where to trade cattle. In some cases, professional market reporters  
attend sales and distribute volume and price information through the USDA Market  
146 News Service. Where market reporters are unavailable, or to provide additional  
information, sale reports might be generated by the market itself and publicized  
148 on its own website. A subset of markets list specific lots of cattle sold in their sale  
reports, including a location of origin, number of cattle, and other attributes. These  
150 data, sometimes labeled “representative sales” as we refer to them here, indicate  
cattle were transported from the origin to market on, or very near, the sale date.

152 We aggregated representative sales from several livestock markets and georef-  
erenced each location of origin to a US county or county-equivalent (hereafter  
154 “county”). Overlapping and incomplete directories of US livestock markets are  
maintained by multiple regulatory agencies or business associations: we compiled  
156 four such directories to identify target markets [36]. The directory released by  
the Livestock Marketing Association [37] uniquely provides websites of livestock  
158 markets, when available. We manually searched the 322 listed websites for repre-  
sentative sales, and wrote software to parse data from sites that regularly (usually

160 weekly) publish market reports and which permit crawling by the Robots Exclusion  
162 Protocol. For each lot provided as a representative sale, the software attempts to  
164 parse the consignor’s location along with cattle type (e.g. steer or heifer), number,  
166 average weight and price (either per head or per hundred weight). A single ani-  
168 mal per lot was assumed whenever the number of cattle could not be parsed. We  
170 tuned the parser for each website until two researchers found no data extraction er-  
rors in independent spot checks of representative sales. Websites were subsequently  
checked twice weekly for new reports, and parsers returning data of the wrong type  
(i.e. string or numeric) were promptly corrected. This study addresses sale reports  
obtained between June 2014 and June 28, 2015, including some archived reports on  
sales dating from the first week of 2012.

Acceptable locations of origin are given as the name of a city or other populated  
172 place, with or without a state, and can be ambiguous. We matched each location,  
174 substituting common abbreviations for full words as needed to obtain a match, to  
176 names of populated places in North America using the GeoNames web-service [38]  
in order to identify the encompassing county. The county closest to the reporting  
market, as determined by the great-circle distance (GCD) between county centroids  
[39], is recorded as the true location of origin.

## 178 **Comparison with Interstate Shipments**

Interstate cattle shipments are present among representative sales, allowing a com-  
180 parison to cattle shipping data obtained from state ICVI records. For each state  
182 with at least one market in our study, we correlated the number of cattle in repre-  
184 sentative sales originating in every other state with the analogous interstate flows  
reported by Shields and Mathews [5]. The ICVI data sampled shipments occurring  
in the 2001 calendar year, which pre-dates all sale reports collected for this study.  
To match the time scale of the certificate-derived data, we aggregated representative  
186 sales over the year preceding June 28, 2015 before calculating correlations. However,  
188 the comparison necessarily reflects over a decade of change in the livestock system  
on top of any differences between market shipments and shipments accompanied by  
ICVIs.

## 190 **Analysis of Sampling Rate**

We analyzed variation in the sample size for each sale report by fitting a GLMM to  
192 the number of head in representative sales, given the total head of cattle sold (“re-  
194 ceipts”), using covariates from the agricultural census [4]. The analysis intends to  
196 address two issues: estimation of sampling rate for reports where the total receipts  
is unknown, and detection of potential bias among representative sales. Represent-  
198 ative sales are not randomly sampled with equal weight from all cattle shipped  
to reporting markets, but are effectively stratified by sale report. Because markets  
may vary the proportion of sales listed as representative, each sale report should  
200 have an associated sample weight for shipments found in that report. Estimation  
202 that involves aggregation across sale reports should take this weight into account,  
but receipts are unknown for roughly one third of sale reports. By taking covariates  
into account while estimating unknown receipts with a fitted GLMM, resulting es-

204 timates will address certain biases that show up as statistical associations between  
known sampling rates and covariates for a given sale.

206 Receipts for a given sale are taken from USDA Market News Service reports [40]  
or, when available, from the market’s own report. Covariates included as fixed ef-  
208 fects include the inventory and sales of cattle, as well as the number of cattle oper-  
ations, in the county where the market is located [4], the number of representative  
210 sales, the sale year and the sale week. Numeric covariates were first log transformed  
and standardized. Each market is additionally allowed a random intercept, repre-  
senting unexplained variation attributed to average behavior of individual markets.  
212 To avoid possible parameter bias, we added an observation level random intercept  
to eliminate overdispersion [41]. We fit a binomial family GLMM with logit link  
214 function using the ‘lme4’ package [42], and performed Wald  $\chi^2$  tests for significance  
of fixed effects using the ‘car’ package [43], in R version 3.1.3 [44].

## 216 Network Inference: Edge Prediction

218 The definition of nodes and the meaning of edges in contact networks for disease  
models are flexible, facilitating data-driven modeling approaches. Models for disease  
spread among livestock incorporate transportation data as edges in the network of  
220 contacts between susceptible and infected individuals [e.g. 10]. Representative  
sale data is compatible with a model having two types of nodes: one representing all  
222 farms, ranches and other long-term animal holdings located within a given county,  
and one representing a single market. In order to study the contribution of markets  
224 to the livestock transportation network, and its consequence for disease spread, we  
ignore edges between counties that arise from fence-line contact, private sales, trans-  
226 portation for grazing, and other mechanisms that might transmit disease directly  
between counties. Observing no indication of market-to-market transportation in  
228 the representative sales, we assumed their absence as well. As a result, the only  
edges in a network derived from representative sales are between nodes of different  
230 types, yielding a bi-partite contact network.

Edge prediction is any process for inferring the properties of unobserved edges,  
232 which must be made explicit for disease models that use contact networks to drive  
infectious interactions between nodes [e.g. 22]. A primary goal of edge prediction  
234 is to build a model that reflects clustering within the transportation network, or  
the propensity of livestock operations within different counties to trade cattle at the  
236 same two markets, without directly observing these second-degree interactions. A  
model that represents higher-order structural attributes of the network, including  
238 clustering, may yield different predictions for the spread of disease, but direct esti-  
mation of these attributes requires particular sampling methods [45]. For example,  
240 a random sample of nodes is not appropriate for estimating clustering coefficients;  
a first-wave link tracing approach [*sensu* 46] is needed to avoid underestimating  
242 the number of triangles touching each focal node.

244 We applied a regression approach to the problem of edge prediction, using ob-  
served edges to estimate whether county and market covariates predict their connec-  
tivity. The response variable is the number of cattle shipped from a given county to  
246 a market, which we assume to arise from a zero-inflated negative binomial (ZINB)  
distribution. This GLM includes the sales, inventory and number of farms for cattle

248 (including calves) for each county of origin, GCD distance between the centroids of  
each county and the county of each market, the square of this distance, the num-  
250 ber of livestock markets giving an address in each origin county, a boolean factor  
indicating whether the market is in the county, and a boolean factor indicating  
252 whether both are in the same state. All numeric predictors are normalized to unit  
variance with zero mean. Finally, the model includes a fixed effect of market: in  
254 the simpler case of a Poisson GLM, this fixed effect would have no effect on the  
resulting multinomial probability of cattle originating from each county, given the  
256 total number of cattle by market. The more complicated ZINB, necessary to obtain  
a good fit to the observed edges, comes at the cost of incorporating a meaningful  
258 market effect which will interfere with edge prediction for non-reporting markets.  
We fit the ZINB GLM using the 'pscl' package in R [47].

## 260 Disease Consequence of Degree Distribution

A key insight from network epidemiology is that the degree distribution for contacts among individuals, or nodes, is of primary importance for disease spread [48, 49]. Edge prediction is not needed to infer the degree distribution among livestock markets; we may assume the number of counties appearing in the representative sales data for each market are independent samples from this distribution, and then specify the remaining network properties parametrically. We define  $k_i$  as the sampled degree for market  $i$  of  $m$  markets. Empirical estimates for the market degree distribution generating function,  $G_{M,0}(x)$ , and the generating function for market “excess degree” [e.g. 50 eq. 12],  $G_{M,1}(x)$ , are

$$G_{M,0}(x) \approx \frac{1}{m} \sum_{i=1}^m x^{k_i} \quad (1)$$

$$G_{M,1}(x) \approx \frac{\sum_{i=1}^m k_i x^{k_i-1}}{\sum_{i=1}^m k_i}. \quad (2)$$

We specify properties of the full network by choice of the algorithm for connectivity and the probability distribution for county degree: we assume a bi-partite configuration model for edges and a Poisson distribution on county degree. In a static network with these properties, the expected size of a disease outbreak in terms of the number, or proportion, of counties affected can be calculated exactly [51]. With  $\tau_C$  and  $\tau_M$  the disease transmission probabilities from counties and markets, respectively, and the mean county degree equal to  $\lambda_C$ , the epidemic threshold is a fixed value of  $\phi = \tau_C \tau_M \lambda_C$  determined by the market degree distribution. The threshold occurs at

$$\phi^{-1} = G'_{M,1}(1). \quad (3)$$

For parameterizations below this threshold, the expected number of counties affected by an outbreak is

$$1 + \frac{\phi G'_{M,1}(1)}{1 - \phi G'_{M,1}(1)}. \quad (4)$$

For parameterizations above this threshold, the proportion of counties in the epidemic is

$$1 - e^{\lambda_C(u-1)}, \quad (5)$$

where  $u$  is the smallest root of

$$u = (1 - \tau_C) + \tau_C G_{M,1} \left( (1 - \tau_M) + \tau_M e^{\lambda_C(u-1)} \right). \quad (6)$$

See S1 Text for an explanation of these equations.

262 Two features of representative sales data conflict with applying this 'random  
263 graph' approach to network modeling of livestock disease spread. First, the degree  
264 of each market potentially varies from sale to sale, admitting possible temporal  
265 variation in the observed degree distribution. We examine the extent of variation  
266 in degree by visualizing temporal variation and calculating seasonal estimates of  
267 epidemic size. Second, the representative sales may not include all the counties of  
268 origin, potentially biasing the observed distribution toward smaller degrees. Using  
269 the iNEXT R-package developed for analysis of species accumulation curves [52,53],  
270 we calculate complete degree estimates for each sale using extrapolation of the  
271 county accumulation curve as a function of the number of cattle in representative  
272 sales.

## Results

274 Cattle transported to 55 markets located in 53 counties in 16 states are represented  
275 in this analysis (Box 1). The first section below describes seasonal trends observed  
276 in the representative sales, the fair to strong correlation with published records of  
277 inter-state shipments, and quantifies the unexplained variation in the proportion of  
278 sales that different markets report as representative of a live auction. In the next  
279 section, we relate edge presence and weight to their distance and county covariates  
280 from the agricultural census, as well as unexplained differences between markets.  
281 The last section provides a demonstration of network epidemiological inferences  
282 that incorporates degree distributions from representative sales data. Data on each  
283 movement, summarized in tables suitable for reproducing our analyses, are freely  
284 available online (S2 Text).

### Characteristics of Representative Sales

286 The average number of cattle movements reported in representative sales for a live  
287 auction increases to a peak of 1000-1500 head in late fall and decreases to a few  
288 hundred during summer months (Fig 1A). This seasonal trend persists between  
289 the period for which representative sales come from a handful of markets with  
290 accessible archives and the period since mid-2014, when we began capturing rep-  
291 resentative sales posted weekly (Fig 1B). At a given sale, livestock markets report  
292 receiving cattle from 11.2 (SD 1.5) counties on average, with weekly average mar-  
293 ket degree showing seasonal variation peaking in late autumn (Fig 1C). While the  
294 timing of peak degree closely corresponds to the time of year when the number of  
representative sales is also greatest, the troughs in degree are flatter, broader and



296 less pronounced than the summertime lows in representative sales. The seasonal  
fluctuation in market degree is weakest during the most recent year, for which the  
298 sample size is larger as well as geographically more expansive. Aggregating across  
all markets, the proportion of sales that originate in-state shows no trend in devi-  
300 ations from an average of 0.84 (SD 0.07) (Fig 1C). Markets selling the majority of  
out-of-state cattle appear to be clustered in Oklahoma and South Dakota, where it  
302 is not uncommon for less than half of representative sale cattle to originate in-state  
(Fig 1E).

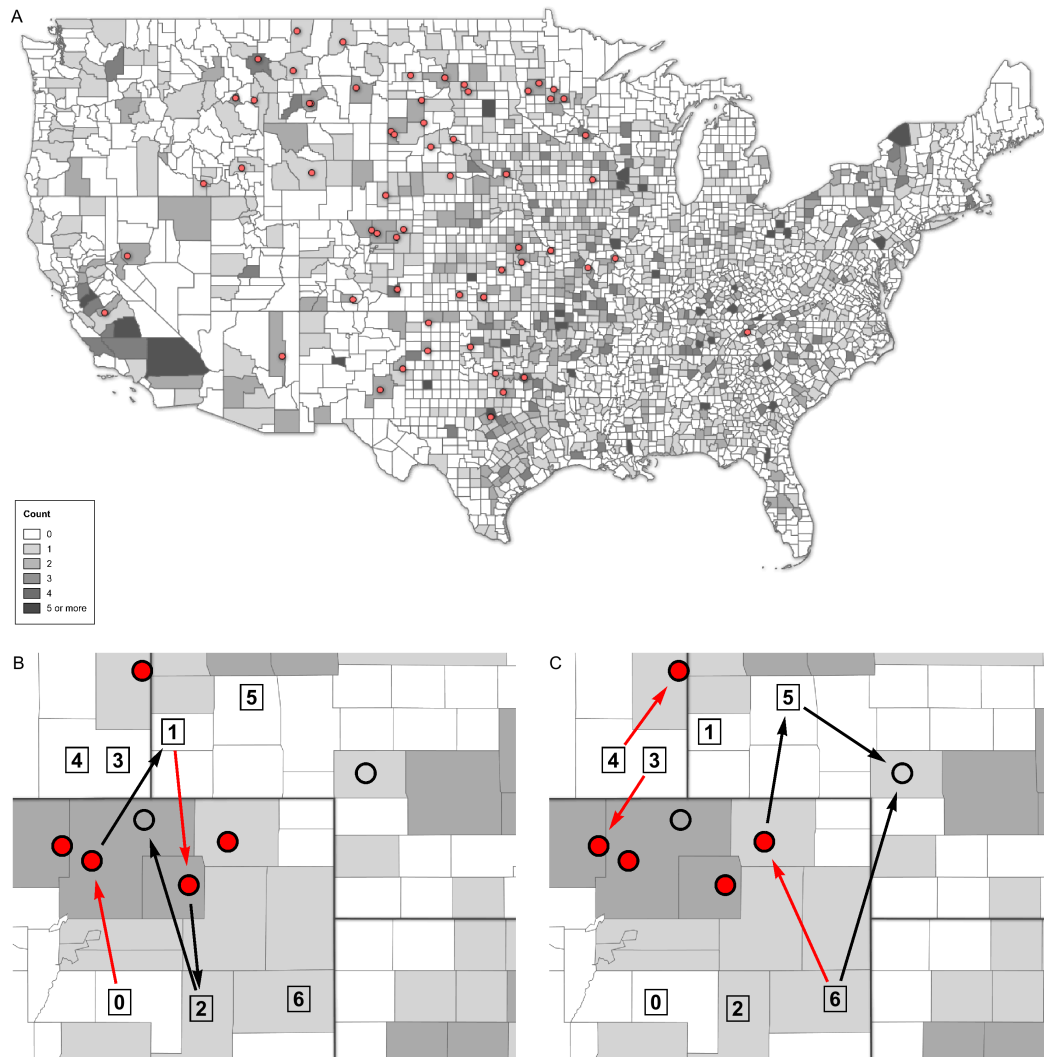

Box 1: Cattle trade at live auction markets is an integral part of the US livestock system. Markets are distributed widely throughout the US because different operations specialize on different stages of production and trade cattle at live auction to obtain the best price. By collecting representative sales from markets with online reports, we obtain a sample of the cattle transportation network. A) The number of livestock markets per county (grayscale) in a compilation of public and private market directories [36], as well as the location (red points) of the livestock markets reporting representative sales collected for this study. B & C) In northeastern Colorado and adjacent states, four markets (red points) post representative sales online, revealing movement of cattle from unspecified farms (numbered squares) to specified markets (red arrows). Black arrows represent un-sampled edges representing movement of cattle leaving a market or sold at non-reporting markets (black circles). B) Individual animals may pass through multiple markets and farms; for example, a cow-calf operation (0) will sell weaned steer calves for purchase by a stocker/back-grounder (1), who subsequently sells the animal to a buyer for a feed-lot (2), which sells the fed steer at auction for slaughter. C) Our method of data collection aggregates farms within counties, so farms 3 and 4 would be combined in a single node connected to two markets. Another limitation of the data is that closed cycles in the transportation network, the loop involving farms 5 and 6 for example, cannot be observed directly.

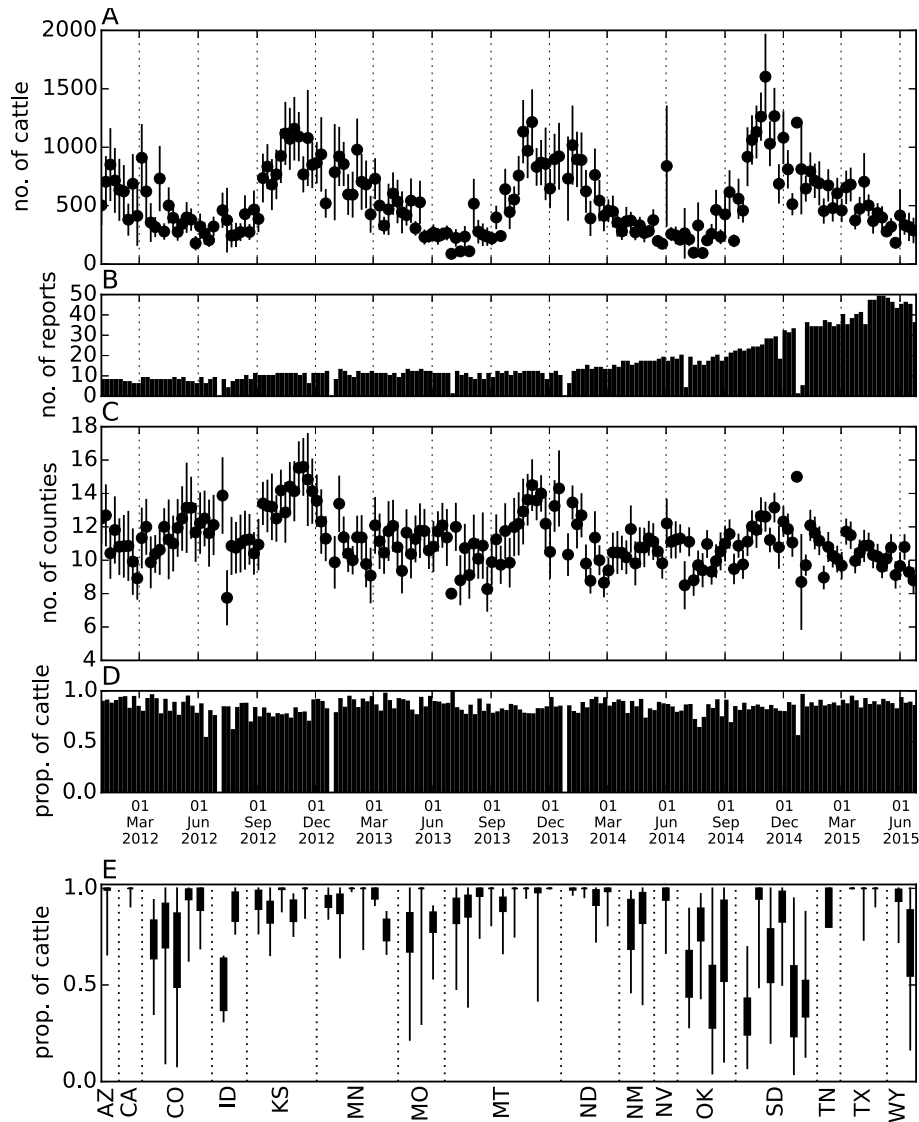

Figure 1: Representative sales captured for a 3.5 year time span that include the county of origin for each shipment to a given market. A) The average ( $\pm$  SEM) head of cattle reported with locations of origin each week by a single livestock market. The outlying observation in the first week of June, 2014 includes a massive sale conducted by the World Livestock Auctioneer Champion in Ft. Pierre, SD. B) The total number of reports collected for cattle sales occurring within a given week. C) The average ( $\pm$  SEM) number of counties from which cattle arrived for sale at a market on a given week. D) The proportion of representative sales from all reporting markets that originate within state for a given week. E) The proportion of representative sales that are transported from a county within the same state to each reporting market.

304 The state of origin for interstate shipments show fair to strong correlation with  
certificate-derived data from 2001 (Table 1). Among the states we could compare  
306 to this published summary of interstate transportation, and aside from Idaho, the  
proportion of cattle shipped within state is above 71%, so the number of cattle  
308 shipments used for each correlation is relatively small. For example, a nearly exact  
correlation results for New Mexico, but the number of head in representative sales  
310 available for comparison is only a few thousand head. South Dakota has the largest  
number of cross-border representative sales that we observed, however, and also  
312 shows a strong correlations of 0.79. Montana and Colorado have similarly large  
sample sizes, the first showing a strong correlation of 0.88 while the latter is among  
314 the weakest at 0.46. Shipments into Texas and California are insufficient for a  
meaningful comparison, while the lowest correlation (0.24 for Idaho) is driven by one  
316 strong connection to Nye County in Nevada. Variation in the strength of correlation  
across sample sizes suggests the presence of real variation in the kind of interstate  
318 shipments sampled by different data streams. Differences here could be due to the  
relative proportions of shipments that are market bound versus non-market bound  
320 as well as heterogeneity in state requirements for health certificates.

Table 1: Correlations between inter-state representative sales and inshipment data from Shields & Mathews [5]. For each destination state with market data, the table shows the Pearson correlation ( $r$ ) for the number of cattle from  $n$  origin states, along with the total head of cattle in the representative sales used and the proportion ( $p$ ) of representative sales used.

| Dest. | $p$  | Head  | $n$ | $r$  |
|-------|------|-------|-----|------|
| CA    | 1.00 | 6     | 43  | 0.30 |
| CO    | 0.85 | 10557 | 23  | 0.46 |
| ID    | 0.49 | 1155  | 43  | 0.24 |
| KS    | 0.93 | 3386  | 38  | 0.58 |
| MN    | 0.96 | 2124  | 37  | 0.49 |
| MO    | 0.81 | 6367  | 17  | 0.41 |
| MT    | 0.93 | 11996 | 16  | 0.88 |
| ND    | 0.97 | 4714  | 3   | 0.79 |
| NM    | 0.84 | 3722  | 17  | 0.99 |
| NV    | 0.95 | 232   | 28  | 0.89 |
| OK    | 0.71 | 3927  | 18  | 0.73 |
| SD    | 0.74 | 95570 | 39  | 0.79 |
| TX    | 1.00 | 35    | 33  | 0.82 |
| WY    | 0.86 | 7506  | 28  | 0.73 |

322 Uncertainty about the total number of animals shipped to market for a given  
sale is amplified by unknown sources at the market level and to a lesser extent for  
each individual report. For roughly one third of market reports, the total receipts  
324 is not available for use in weighting the sale's affect on estimates aggregating across  
sales or markets. In other reports, the proportion of sales given as representative is

326 associated with the number of representative sales ( $\chi_1^2 = 2.40 \times 10^3$ ), with a positive  
327 regression coefficient (approx. 95% CI 0.88 to 0.95). Both year ( $\chi_3^2 = 17.7$ ) and  
328 week of year ( $\chi_{50}^2 = 4.64 \times 10^2$ ) are associated with variation in the sampling proba-  
329 bility, but none of the covariates taken from agricultural census data are significant.  
330 Overall, the fixed effects contribute the majority of variation in the fitted GLMM,  
331 leaving the random effect of market (SD = 0.82) and the observation level ran-  
332 dom effect (SD = 0.20) to explain the remainder of the variance between sampling  
333 probabilities. Average differences between markets account for 20% of the variance;  
334 however, the observed proportions remain overdispersed with respect to the model  
335 fitted without observation level random intercepts. In other words, variation in  
336 the binomial sampling probability predicted by the fitted model for each market  
337 underestimates actual variation observed in the representative proportion (Fig 2).  
338 Observation level random intercepts are included to account for the remaining 12%  
339 of variance in the proportion of cattle reported in the representative sales, but the  
340 random intercept for each market is the greater source of uncertainty.

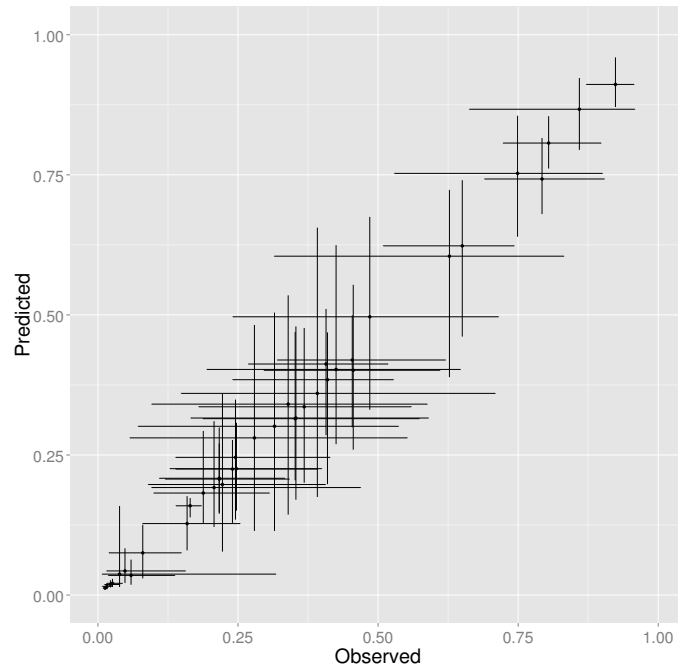

Figure 2: Observed versus predicted proportions of cattle listed as representative sales, grouped by market. Horizontal bars show within-market variability in the observed ratios of representative sales to receipts. Vertical bars show corresponding variability in the binomial sampling probability predicted by the GLMM described in the main text, but with the observation level random effect dropped. Bars intersect at the mean and extend from the 5<sup>th</sup> to 95<sup>th</sup> percentiles.

## Edge Prediction

342 The regression model returns a negative coefficient for the impact of distance (ap-  
343 prox. 95% CI -2.07 to -1.42) on the average number of cattle shipped from a county  
344 to market, as well as a positive coefficient (approx. 95% CI 6.88 to 7.61) that as-  
345 sociates greater distances with zero-inflation, or the absence of an edge between  
346 county and market. This confirms intuition that cattle are preferably shipped to  
347 nearby markets, and quantifies the effect of distance to use when extrapolating edges  
348 for non-reporting markets. In addition, both distance-related factors for edges link-  
349 ing counties to markets within that county ( $\chi_1^2 = 65.5$ ) or within the same state  
350 ( $\chi_1^2 = 92.6$ ) are significant predictors. The covariates extracted from the agricul-  
351 tural census have inconsistent results, possibly due to their strong inter-correlations.  
352 The effect of sales (approx. 95% CI -0.19 to -0.05) and inventory (approx. 95% CI  
353 0.93 to 1.78) on the average head of cattle shipped are of opposite sign, while the  
354 number of farms is insignificant. Because the covariates are standardized, we can  
355 interpret the result to mean that the size of cattle operations measured by head is of  
356 greatest importance and is consistent with the hypothesis that counties with larger  
357 inventory contribute more heavily weighted edges. Among the census covariates,  
358 only the number of farms has a non-zero (approx. 95% CI -0.62 -0.40) effect on  
359 zero-inflation.

360 Judged by simulated response variables generated by the fitted ZINB model,  
361 the model shows a good fit to the observed transportation network (Fig 3). Market  
362 degree distributions obtained with simulated response variables are uniformly simi-  
363 lar to the observed distribution for market in-degree aggregated over the full study  
364 period (Fig 3A). While a single realization of simulated edge data cannot reveal the  
365 model's degree of uncertainty, mapping the edges provides visual confirmation of  
366 the role of distance and distance related factors on the weight of network edges (Fig  
367 3C&D). The most striking difference between the observed and simulated response  
368 is the weight of long-distance edges, suggesting that observed shipments are either  
369 more clustered on a fewer number of edges (including long-distance edges) or are  
370 even more commonly from nearby counties than simulated shipments.

Inclusion of the fixed effect of market in the ZINB model greatly improves the  
371 fit ( $\Delta\text{AIC} = -3340$  on 55 degrees of freedom), but eliminates direct application of  
372 the model in predicting cattle shipments to non-reporting livestock markets. The  
373 fitted coefficients for market effects could instead be modeled as random effects,  
374 and extrapolation to a full network carried out under the assumption that reporting  
375 markets are an unbiased sample with respect to network attributes. Based on the  
376 fitted intercepts for each market, however, the usual assumption of normality for  
377 random intercepts may not be justified (Fig 3B).

## Epidemic Size on Random Graphs

380 A model for disease spread that does not include a full contact network is possible  
381 under the assumption that epidemics develop as a tree-like graph, and is related  
382 to the representative sales data through estimates of the market degree distribu-  
383 tion. The majority of seasonal variation in the distribution on market degree exists  
384 between a peak season (from the 39th (the last week of September) through years

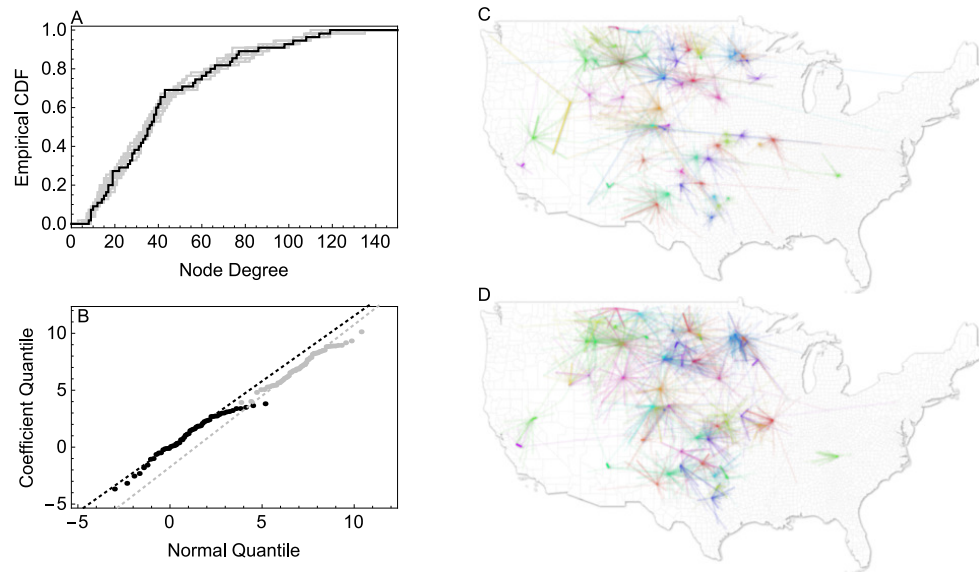

Figure 3: Comparison between the origin of representative sales observed and simulated using the fitted zero-inflated GLM. A) The (unweighted) node degree distribution observed (black) and returned in ten simulations of the fitted model (gray). B) Normal quantile plot of the estimated fixed effect of each market on the mean head count (black) and zero-inflation probability (gray). C) The observed proportion of cattle from each market's representative sales by county of origin, aggregating all available sale reports. D) The simulated proportion of cattle from each of county of origin, again grouped by market, in one simulation from the fitted GLM. Edge coloration corresponds to individual markets, and opacity is linearly scaled between a maximum proportion or probability of 0.8 (transparency at 0%) and a minimum of 0.004 (transparency at 80%).

end) and the remaining off-peak portion of the year, which exhibit distinct empirical  
386 cumulative distribution functions (ECDFs; Fig 4A). The former is indistinguishable  
from a negative binomial distribution by Pearson's goodness-of-fit test ( $\chi^2_{15} = 14.0$ )  
388 while the latter, although similar in shape, is not ( $\chi^2_{17} = 60.9$ ).

For a disease spreading on a bi-partite random graph with these market degree  
390 distributions, seasonal variation effects the location of the epidemic threshold with  
respect to the unknown parameters. Roughly 20% lower values of  $\phi$ , the product of  
392 market and county transmissibilities and mean county degree, prompt an epidemic  
for the peak time of year relative to off-peak (Fig 4C). Above the epidemic threshold,  
394 the difference between seasons becomes negligible as transmissibility increases; it is  
overwhelmed by the overall high degree of livestock markets. Even with the average  
396 excess degree of counties equal to one, nearly two-thirds of counties are affected in  
the extreme case that every contact between susceptible and infective cattle leads  
398 to successful disease transmission (Fig 4D).

The number of counties included in representative sales is, on average, 8.6% of  
400 the estimated number of counties extrapolated from county accumulation curves.  
In over half of sale reports, the estimate is less than 1% greater than the observed

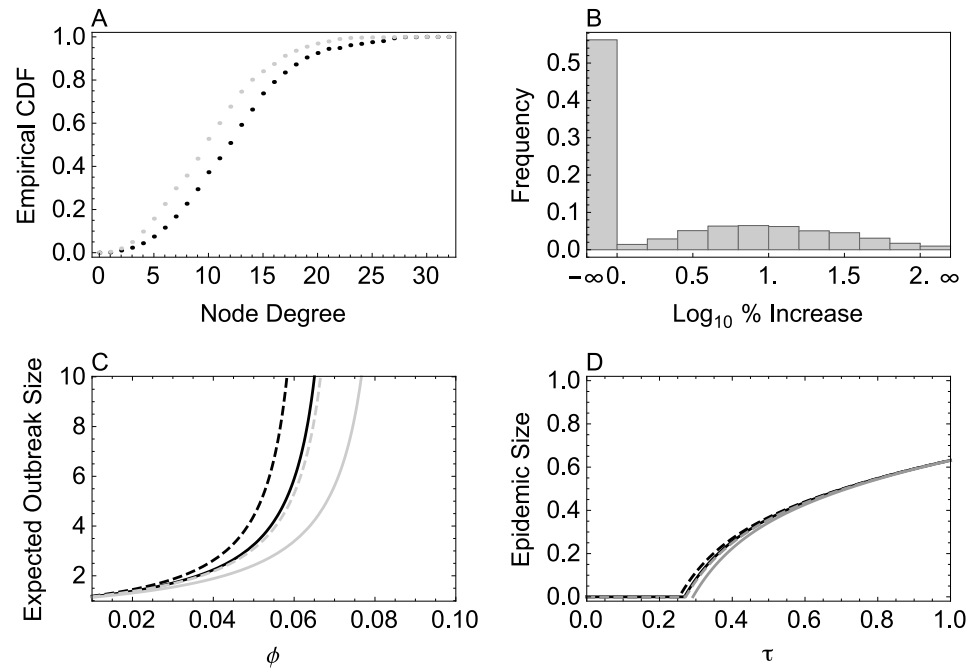

Figure 4: Empirical market degree distributions inferred from representative sales and implications for disease spread on the corresponding random graph. A) Raw degree distribution for sales occurring during peak (black) and off-peak (gray) seasons. B) Percent increase in extrapolated degree relative to sampled degree, with extrapolation up to the total receipts. C) Expected number of counties affected by a disease outbreak during the “peak” season (black) or “off-peak” time of year (gray), using either observed (solid) or extrapolated (dashed) degrees.  $\phi$  is a product of  $\tau_M$ ,  $\tau_C$ , and  $\lambda_C$ . D) Proportion of counties affected in the four cases shown in panel C but above the epidemic threshold, assuming  $\tau_M = \tau_C = \tau$  and  $\lambda_C = 1$ .

402 number of counties, and among the rest the most common increase in degree is  
 403 just 10% (Fig 4B). The rarity of singleton counties (i.e. counties with only one  
 404 individual in representative sales) and the sufficiently high sampling rates (Fig 2)  
 405 are responsible for the completeness of the sample for counties of origin. Using the  
 406 extrapolated values in calculating disease spread on a random graph has the same  
 407 qualitative effect as the shift from off-peak to peak season market degree distribu-  
 408 tions. Quantitatively however, the difference between observed and extrapolated  
 409 market degree distributions has less impact than season on the estimates of disease  
 410 spread (Fig 4C&D).

## Discussion

412 The epidemiological contact network is a fundamental component of models for  
 413 the spread of diseases, and sale reports publicized by livestock auction markets  
 414 contribute urgently needed data to support inference of such networks within the



US livestock system. For this study, we initiated an ongoing process to archive  
416 representative sales as an opportunistic sample of cattle transported from counties  
with beef or dairy operations to livestock markets distributed across the US. The  
418 study complements previous efforts to summarize transportation of cattle within the  
US using data derived from certificates of veterinary inspection [5,21], but extends  
420 our ability to model within-state shipping patterns. We demonstrate how inference  
of a bi-partite contact network, between nodes representing either cattle holding  
422 operations aggregated within a US county or a particular auction market, can allow  
for new models for the spread of economically disruptive livestock diseases.

424 Representative sales extracted from livestock market reports provide a reliable  
sample of cattle shipments and the corresponding potential for disease transmitting  
426 contacts. Seasonal variation in the volume of representative sales is consistent with  
beef cattle production systems, where calves are produced in spring and weaned  
428 cattle or yearlings sold to pasturing or feedlot operations in the fall and subsequent  
spring [54]. The proportion of receipts at a given sale whose origin can be identified  
430 is anywhere from a negligible fraction to around three quarters, and understanding  
this variability is important for scaling up assessments of transportation networks.  
432 The dominant source of uncertainty is variation between markets, but this can  
be quantified for future modeling efforts despite having no identified deterministic  
434 source. Covariates taken from the agricultural census on the county where markets  
are located do not influence the proportion of sales reported, which reduces concern  
436 about biasing population estimates from the representative sales.

Interstate shipments among representative sales correlate fairly well with ICVI  
438 data, while the remaining majority of representative sales provide unmatched data  
on cattle shipments that remain within states. Intrastate shipment data were pre-  
440 viously unavailable and dominate market directed shipments at typically over 80%  
on any week. Although transportation of infectious cattle within a state would not  
442 immediately spark a regional epidemic, cattle movements at this scale could spread  
disease beyond the 10km control radius to be established around infected premises  
444 in response to FMD detection within the US [1]. Sale at livestock markets is not the  
only impetus for cattle transportation, but the correlation between representative  
446 sale origins and ICVI origins for transportation between states demonstrates its  
importance. Indeed, if the certificate-derived data do sample all movements with-  
448 out bias, then the magnitude of correlation with representative sales supports the  
hypothesis that most cattle (excepting slaughter animals) shipped between states  
450 are bound for a livestock market. Shipments leaving livestock markets would have  
to primarily remain in-state, and therefore be absent from certificate-derived data,  
452 for this hypothesis to hold: for example, it implies the testable conclusion that feed-  
lots and back-grounders obtain most cattle born out-of-state from in-state livestock  
454 markets.

The market-derived data allows estimates for contact networks ranging in com-  
456 plexity from random graphs, which have many analytically tractable properties,  
to networks with non-trivial clustering, modularity, assortativity and other non-  
458 random features. A collection of edge data, resulting from sampling random nodes  
without tracing its edges to sample additional nodes, is an ego-centric sample that  
460 allows straightforward estimation of node, but not edge, attributes [45]. From this  
sample, we find market degree distributions that fit a negative binomial distribution

462 with variance roughly twice the mean, which has more dispersion than a Poisson  
distribution but less than a power law. We also find seasonal shifts in the de-  
464 gree distribution that lower the epidemic threshold of a random graph during the  
peak cattle trading season. However, the overlapping marketsheds apparent in this  
466 sample suggest high potential for network clustering, which tends to dampen the  
spread of disease but is not easily assessed from an ego-centric sample [55]. Esti-  
468 mating this kind of structural attribute requires inference about unobserved edges,  
and a first analysis shows potential for incorporating linear effects of county and  
470 market attributes in exponential family likelihoods for edge weight. Extensions to  
this likelihood that include multiple response variables, particularly market degree  
472 and squares in the bi-partite network, may achieve a reliable fit to the represen-  
tative sales that provides a data-driven, non-random graph for livestock disease  
474 simulations [46].

Despite the increased availability of data on livestock transportation in the US  
476 that our study provides, disease models here lag behind the relatively data rich  
European livestock systems. Research in these systems on the optimal spatial and  
478 temporal resolution at which to model contact networks is critical for efficient use  
of limited information available in the US and targeted development of new data  
480 streams. In a spatially embedded contact network, each node represents a geo-  
graphically constrained subpopulation within an interacting metapopulation [56].  
482 The constraint should reflect where mixing of susceptible and infected individuals  
occurs in proportion to their frequencies, but no theory exists for transferring con-  
484 straints developed in one region (e.g. the UK) to any other (e.g. Pennsylvania). The  
abstraction of temporally discrete livestock shipments into static edges, represent-  
486 ing the potential for disease transmission over time, is better understood [7,57]. An  
additional challenge, for a contact network distinguishing livestock markets from  
488 longer term animal holdings, is the synchronicity of shipments of cattle between  
two counties arriving at the same market. Extreme cases of complete segregation of  
490 cattle from different origins versus within market mixing should bracket the range  
of disease outcomes [33].

492 The greater purpose of collecting data on livestock transportation is to improve  
surveillance for disease outbreaks and to guide prevention or control of epidemics.  
494 The sources of nation-wide data on US livestock movements contributing to these  
goals have previously included health certificate records accompanying interstate  
496 movements [5, 21] and owner/operator surveys on animal health and management  
practices for representative animal holdings [58]. Future research should aim to com-  
498 bine these sources with representative sales data to jointly infer contact networks,  
because each data source addresses network attributes absent from the others. The  
500 primary deficiency of representative sales data is the absence of out-going shipment  
information, or the destination of cattle purchased at auction. Surveys of livestock  
502 operations presently include information on the in-shipment degree, source type and  
distance, which may provide evidence about the missing outgoing edges for livestock  
504 markets. Representative sales also only include market-directed shipments, while  
health certificate data provides information on network edges that may not have a  
506 livestock market at either end. Especially in combination, which we recognize to  
be a difficult task both conceptually and statistically, inference from multiple data  
508 sources will dramatically improve awareness of the network of potentially disease

spreading contacts between livestock.

## 510 **Supporting Information**

### **S1 Text**

512 **Disease Percolation on a Directed Bi-Partite Random Graph.**

### **S2 Text**

514 **Description of Data Release.**

## **Acknowledgments**

516 The authors want to acknowledge several undergraduate or graduate assistants who  
contributed to software development: Daniel Anderson, Adam Graves, Ching-Hao  
518 Hu, and Xinyang Jiang. We thank Nancy Robinson at the Livestock Marketing  
Association for sharing a member directory, and Centennial Livestock Auction of  
520 Fort Collins, CO for answering questions on cattle market practices. We also thank  
Jason E. Lombard (USDA-APHIS-VS) for several helpful conversations about live-  
522 stock marketing practices. Funding for contributions by ITC and SB was provided  
through DHS Contract #HSHQDC-12-C-0014, with additional support from the  
524 RAPIDD Program of the Science & Technology Directorate, Department of Home-  
land Security, and the Fogarty International Center, National Institutes of Health.  
526 The analyses, views and conclusions contained in this document are those of the au-  
thors and should not be interpreted as necessarily representing the regulatory opin-  
528 ions, official policies, either expressed or implied, of the USDA-APHIS-Veterinary  
Services or the U.S. Department of Homeland Security.

## **References**

- [1] US Department of Agriculture. Foot-and-Mouth Disease Response Plan: The Red Book. USDA:APHIS:VS, FAD PReP; 2014. Available from: [http://www.aphis.usda.gov/animal\\_health/emergency\\_management/downloads/fmd\\_responseplan.pdf](http://www.aphis.usda.gov/animal_health/emergency_management/downloads/fmd_responseplan.pdf).
- [2] Thompson D, Muriel P, Russell D, Osborne P, Bromley A, Rowland M, et al. Economic costs of the foot and mouth disease outbreak in the United Kingdom in 2001. *Revue scientifique et technique (International Office of Epizootics)*. 2002;21(3):675–687.
- [3] Carpenter TE, O’Brien JM, Hagerman AD, McCarl BA. Epidemic and economic impacts of delayed detection of foot-and-mouth disease: a case study of a simulated outbreak in California. *Journal of Veterinary Diagnostic Investigation*. 2011;23(1):26–33.

- [4] US Department of Agriculture. 2012 Census of Agriculture. USDA:NASS; 2012. Available from: <ftp://ftp.nass.usda.gov/quickstats/qs.census2012.txt.gz>.
- [5] Shields DA, Mathews KH. Interstate Livestock Movements. US Department of Agriculture, Economic Research Service; 2003. Available from: [http://www.ers.usda.gov/media/312234/ldpm10801\\_1\\_.pdf](http://www.ers.usda.gov/media/312234/ldpm10801_1_.pdf).
- [6] Anderson I. Foot and Mouth Disease 2001: Lessons to be Learned Inquiry Report; 2002. Available from: [http://webarchive.nationalarchives.gov.uk/20100807034701/http://archive.cabinetoffice.gov.uk/fmd/fmd\\_report/report/index.htm](http://webarchive.nationalarchives.gov.uk/20100807034701/http://archive.cabinetoffice.gov.uk/fmd/fmd_report/report/index.htm).
- [7] Vernon MC, Keeling MJ. Representing the UK's cattle herd as static and dynamic networks. *Proceedings of the Royal Society B: Biological Sciences*. 2009;276(October 2008):469–476.
- [8] Shirley MDF, Rushton SP. Where diseases and networks collide: lessons to be learnt from a study of the 2001 foot-and-mouth disease epidemic. *Epidemiology and infection*. 2005 Dec;133(6):1023–32. Available from: <http://www.pubmedcentral.nih.gov/articlerender.fcgi?artid=2870335&tool=pmcentrez&rendertype=abstract>.
- [9] Bigras-Poulin M, Thompson RA, Chriel M, Mortensen S, Greiner M. Network analysis of Danish cattle industry trade patterns as an evaluation of risk potential for disease spread. *Preventive Veterinary Medicine*. 2006 Sep;76(1-2):11–39. Available from: <http://www.ncbi.nlm.nih.gov/pubmed/16780975>.
- [10] Kao RR, Danon L, Green DM, Kiss IZ. Demographic structure and pathogen dynamics on the network of livestock movements in Great Britain. *Proceedings of the Royal Society B: Biological Sciences*. 2006 Aug;273(1597):1999–2007. Available from: <http://www.pubmedcentral.nih.gov/articlerender.fcgi?artid=1635475&tool=pmcentrez&rendertype=abstract>.
- [11] Nöremark M, Håkansson N, Lewerin SS, Lindberg A, Jonsson A. Network analysis of cattle and pig movements in Sweden: measures relevant for disease control and risk based surveillance. *Preventive veterinary medicine*. 2011 May;99(2-4):78–90. Available from: <http://www.ncbi.nlm.nih.gov/pubmed/21288583>.
- [12] Dutta BL, Ezanno P, Vergu E. Characteristics of the spatio-temporal network of cattle movements in France over a 5-year period. *Preventive Veterinary Medicine*. 2014;117(1):79–94. Available from: <http://linkinghub.elsevier.com/retrieve/pii/S0167587714002943>.
- [13] Lentz HHK, Korschake M, Teske K, Kasper M, Rother B, Carmanns R, et al. Trade communities and their spatial patterns in the German pork production network. *Preventive Veterinary Medicine*. 2011;98(2-3):176–181. Available from: <http://dx.doi.org/10.1016/j.prevetmed.2010.10.011>.

- [14] Natale F, Giovannini A, Savini L, Palma D, Possenti L, Fiore G, et al. Network analysis of Italian cattle trade patterns and evaluation of risks for potential disease spread. *Preventive Veterinary Medicine*. 2009;92(4):341–350.
- [15] Regulation (EC) No 1760/2000 of the European Parliament and of the Council of 17 July 2000 establishing a system for the identification and registration of bovine animals and regarding the labelling of beef and beef products and repealing Council Regulation; 2000. Available from: <http://eur-lex.europa.eu/legal-content/EN/TXT/?uri=CELEX:32000R1760>.
- [16] Bajardi P, Barrat A, Savini L, Colizza V. Optimizing surveillance for livestock disease spreading through animal movements. *Journal of the Royal Society, Interface / the Royal Society*. 2012 Nov;9(76):2814–25. Available from: <http://www.pubmedcentral.nih.gov/articlerender.fcgi?artid=3479905&tool=pmcentrez&rendertype=abstract>.
- [17] Green DM, Kiss IZ, Kao RR. Modelling the initial spread of foot-and-mouth disease through animal movements. *Proceedings of the Royal Society B: Biological Sciences*. 2006 Nov;273(1602):2729–35. Available from: <http://www.pubmedcentral.nih.gov/articlerender.fcgi?artid=1635508&tool=pmcentrez&rendertype=abstract>.
- [18] Gates MC, Woolhouse MEJ. Controlling infectious disease through the targeted manipulation of contact network structure. *Epidemics*. 2015; Available from: <http://linkinghub.elsevier.com/retrieve/pii/S1755436515000304>.
- [19] US Department of Agriculture, National Agricultural Statistics Service. Meat Animals Production, Disposition, and Income: 2014 Summary; 2015. Available from: <http://www.usda.gov/nass/PUBS/TODAYRPT/meat0415.pdf>.
- [20] Lindström T, Gear DA, Buhnerkempe MG, Webb CT, Miller RS, Portacci K, et al. A bayesian approach for modeling cattle movements in the United States: scaling up a partially observed network. *PloS One*. 2013 Jan;8(1):e53432. Available from: <http://www.pubmedcentral.nih.gov/articlerender.fcgi?artid=3537632&tool=pmcentrez&rendertype=abstract>.
- [21] Buhnerkempe MG, Gear DA, Portacci K, Miller RS, Lombard JE, Webb CT. A national-scale picture of U.S. cattle movements obtained from Interstate Certificate of Veterinary Inspection data. *Preventive Veterinary Medicine*. 2013 Nov;112(3-4):318–29. Available from: <http://www.ncbi.nlm.nih.gov/pubmed/24035137>.
- [22] Buhnerkempe MG, Tildesley MJ, Lindström T, Gear DA, Portacci K, Miller RS, et al. The impact of movements and animal density on continental scale cattle disease outbreaks in the United States. *PloS One*. 2014 Jan;9(3):e91724. Available from: <http://www.pubmedcentral.nih.gov/articlerender.fcgi?artid=3966763&tool=pmcentrez&rendertype=abstract>.

- [23] US Department of Agriculture. Beef 2007-08 Part II: Reference of Beef Cow-calf Management Practices in the United States, 2007-08. Fort Collins, CO: USDA:APHIS:VS, CEAH; 2009. Available from: [http://www.aphis.usda.gov/animal\\_health/nahms/beefcowcalf/downloads/beef0708/Beef0708\\_dr\\_PartII.pdf](http://www.aphis.usda.gov/animal_health/nahms/beefcowcalf/downloads/beef0708/Beef0708_dr_PartII.pdf).
- [24] US Department of Agriculture. Traceability for Livestock Moving Interstate. USDA:APHIS; 2013. 6. Available from: <http://www.gpo.gov/fdsys/pkg/FR-2013-01-09/pdf/2012-31114.pdf>.
- [25] US Department of Agriculture. Beef 200708 Part IV: Reference of Beef Cow-calf Management Practices in the United States, 200708. Fort Collins, CO: USDA:APHIS:VS, CEAH; 2010.
- [26] US Department of Agriculture. Dairy 2007 Part II: Changes in the U.S. Dairy Cattle Industry, 19912007. Fort Collins, CO: USDA:APHIS:VS, CEAH; 2008.
- [27] McReynolds SW, Sanderson MW, Reeves A, Sinclair M, Hill AE, Salman MD. Direct and indirect contact rates among livestock operations in Colorado and Kansas. *Journal of the American Veterinary Medical Association*. 2014;244(9):1066–74. Available from: <http://www.ncbi.nlm.nih.gov/pubmed/24739117>.
- [28] Bates TW, Thurmond MC, Carpenter TE. Direct and indirect contact rates among beef, dairy, goat, sheep, and swine herds in three California counties, with reference to control of potential foot-and-mouth disease transmission. *American Journal of Veterinary Research*. 2001;62:1121–1129.
- [29] RTI International. GIPSA Livestock and Meat Marketing Study. Research Triangle Park, ND; 2007. Available from: [http://www.gipsa.usda.gov/Publications/psp/live\\_meat\\_market.html](http://www.gipsa.usda.gov/Publications/psp/live_meat_market.html).
- [30] Bailey D, Brorsen BW, Thomsen MR. Identifying Buyer Market Areas and the Impact of Buyer Concentration in Feeder Cattle Markets Using Mapping and Spatial Statistics. *American Journal of Agricultural Economics*. 1995;77(2):309–318. Available from: <http://ajae.oxfordjournals.org/content/77/2/309.abstract>.
- [31] McLaws M, Ribble C. Description of recent foot and mouth disease outbreaks in nonendemic areas: exploring the relationship between early detection and epidemic size. *Canadian Veterinary Journal*. 2007;48(10):1051–1062.
- [32] Colizza V, Barrat A, Barthélemy M, Vespignani A. The role of the airline transportation network in the prediction and predictability of global epidemics. *Proceedings of the National Academy of Sciences of the United States of America*. 2006;103(7):2015–2020.
- [33] Dawson PM, Werkman M, Brooks-Pollock E, Tildesley MJ. Epidemic predictions in an imperfect world: modelling disease spread with partial data. *Proceedings of the Royal Society B: Biological Sciences*. 2015;282(1808):20150205–

20150205. Available from: <http://rspb.royalsocietypublishing.org/content/282/1808/20150205?etoc>.
- [34] Gibbens JC, Sharpe CE, Wilesmith JW, Mansley LM, Michalopoulou E, Ryan JBM, et al. Descriptive epidemiology of the 2001 foot-and-mouth disease epidemic in Great Britain: the first five months. *The Veterinary Record*. 2001;149(24):729–743.
- [35] Robinson SE, Christley RM. Exploring the role of auction markets in cattle movements within Great Britain. *Preventive Veterinary Medicine*. 2007 Sep;81(1-3):21–37. Available from: <http://www.ncbi.nlm.nih.gov/pubmed/17482296>.
- [36] Carroll IT, Bansal S. Cattle Auction Markets in the USA: a De-duplicated List Compiled from Trade Association and Federal Agency Directories. V1. Harvard Dataverse. 2014;.
- [37] Livestock Marketing Association. Find an Auction/Dealer; 2014. Available from: <http://www.lmaweb.com/find-an-auctiondealer-2/>.
- [38] GeoNames. Web Service Documentation; 2014. Available from: <http://www.geonames.org/export/web-services.html>.
- [39] Oak Ridge National Laboratory. County-to-County Distance Matrix; 2011. Available from: <http://cta.ornl.gov/transnet/SkimTree.htm>.
- [40] US Department of Agriculture. Livestock, Poultry, and Grain Market News. USDA:AMS; 2015. Available from: <http://www.ams.usda.gov/AMSV1.0/LPSMarketNewsPage>.
- [41] Harrison XA. Using observation-level random effects to model overdispersion in count data in ecology and evolution. *PeerJ*. 2014 Jan;2:e616. Available from: <http://www.pubmedcentral.nih.gov/articlerender.fcgi?artid=4194460&tool=pmcentrez&rendertype=abstract>.
- [42] Bates D, Maechler M, Bolker B, Walker S. lme4: Linear mixed-effects models using Eigen and S4. R package version 1.1-7; 2014. Available from: <http://cran.r-project.org/package=lme4>.
- [43] Fox J, Weisberg S. An {R} Companion to Applied Regression. 2nd ed. Thousand Oaks {CA}: Sage; 2011. Available from: <http://socserv.socsci.mcmaster.ca/jfox/Books/Companion>.
- [44] R Core Team. R: A Language and Environment for Statistical Computing. Vienna, Austria: R Foundation for Statistical Computing; 2015. Available from: <http://www.r-project.org>.
- [45] Morris M. Network epidemiology: A handbook for survey design and data collection. Oxford University Press; 2004.

- [46] Handcock MS, Gile KJ. Modeling social networks from sampled data. *The Annals of Applied Statistics*. 2010;4(1):5–25. Available from: <http://arxiv.org/abs/1010.0891>.
- [47] Zeileis A, Kleiber C, Jackman S. Regression Models for Count Data in R. *Journal of Statistical Software*. 2008;27(8). Available from: <http://www.jstatsoft.org/v27/i08/>.
- [48] Bansal S, Grenfell BT, Meyers LA. When individual behaviour matters: homogeneous and network models in epidemiology. *Journal of the Royal Society, Interface / the Royal Society*. 2007;4(16):879–891.
- [49] Ames GM, George DB, Hampson CP, Kanarek AR, McBee CD, Lockwood DR, et al. Using network properties to predict disease dynamics on human contact networks. *Proceedings of the Royal Society B: Biological Sciences*. 2011;278(1724):3544–3550.
- [50] Newman M. Spread of epidemic disease on networks. *Physical Review E*. 2002 Jul;66(1):016128. Available from: <http://link.aps.org/doi/10.1103/PhysRevE.66.016128>.
- [51] Meyers LA, Newman MEJ, Martin M, Schrag S. Applying network theory to epidemics: Control measures for *Mycoplasma pneumoniae* outbreaks. *Emerging Infectious Diseases*. 2003;9(2):204–210.
- [52] Chao A, Gotelli NJ, Hsieh TC, Sander EL, Ma KH, Colwell RK, et al. Rarefaction and extrapolation with Hill numbers: A framework for sampling and estimation in species diversity studies. *Ecological Monographs*. 2014;84(1):45–67.
- [53] Hsieh TC, Ma KH, Chao A. iNEXT: iNterpolation and EXTrapolation for species diversity. R package version 2.0.; 2014. Available from: <http://chao.stat.nthu.edu.tw/blog/software-download>.
- [54] RTI. GIPSA Livestock and Meat Marketing Study. Report Volume 3. 2007 Feb;3. Available from: [http://www.gipsa.usda.gov/Publications/psp/live\\_meat\\_market.html](http://www.gipsa.usda.gov/Publications/psp/live_meat_market.html).
- [55] Smieszek T, Fiebig L, Scholz RW. Models of epidemics: when contact repetition and clustering should be included. *Theoretical Biology & Medical Modelling*. 2009;6:11.
- [56] Schumm P, Scoglio C, Zhang Q, Balcan D. Global epidemic invasion thresholds in directed cattle subpopulation networks having source, sink, and transit nodes. *Journal of Theoretical Biology*. 2014;367C:203–221. Available from: <http://dx.doi.org/10.1016/j.jtbi.2014.12.007><http://www.sciencedirect.com/science/article/pii/S0022519314006961>.
- [57] Valdano E, Ferreri L, Poletto C, Colizza V. Analytical computation of the epidemic threshold on temporal networks. arXiv preprint. 2014;p. 19. Available from: <http://arxiv.org/abs/1406.4815>.



- [58] US Department of Agriculture. Analysis of Bovine Tuberculosis Surveillance in Accredited Free States. USDA:APHIS:VS; 2009. Available from: [https://www.aphis.usda.gov/vs/nahss/cattle/tb\\_2009\\_evaluation\\_of\\_tb\\_in\\_accredited\\_free\\_states\\_jan\\_09.pdf](https://www.aphis.usda.gov/vs/nahss/cattle/tb_2009_evaluation_of_tb_in_accredited_free_states_jan_09.pdf).

## S1 Text: Disease Percolation on Directed, Bi-Partite Random Graphs

Equations 4 through 6 in the main text summarize results for the spread of disease transmitted with constant probability through a bi-partite random graph. The theory leading to these results is summarized by Newman [1] and Meyers et al. [2]. For convenience we re-present an extension of the basic theory to a directed, bi-partite random graph. But in doing so, we also clarify how the number of infected nodes of just one type, “counties” in our case, may be followed through the derivation.

In a directed, bi-partite graph, where nodes have type  $M$  or  $C$  for market or county, respectively, edges are either  $M \rightarrow C$  or  $C \rightarrow M$ . Let  $G_{C,0}(x)$  be the generating function for the probability distribution on the number of  $C \rightarrow M$  edges leaving a  $C$  node, marginalizing its in-degree. The county “excess degree” distribution is the probability distribution on the number of  $C \rightarrow M$  edges departing from the county at the end of a randomly chosen  $M \rightarrow C$  edge. Its generating function is

$$G_{C,1} = \frac{G'_{C,0}(x)}{G'_{C,0}(1)}, \quad (1)$$

as usual. The market “excess degree” distribution is the same, with  $M$  instead of  $C$ .

The key random variable of interest is  $S_{C \rightarrow M}$ , the number of infected counties in the cluster of nodes reached by tracing the out-going edge of a particular infected county. Let’s denote the generating function for  $S_{C \rightarrow M}$  by  $H_{C,1}(x)$ , and highlight that we’re neither counting the number of markets mixed up in this cluster nor the original county. The function  $H_{M,1}(x)$  will generate the distinct distribution on the number of infected *counties* reached by tracing a  $M \rightarrow C$  edge. We determine these functions by deriving self-consistency equations from the following two observations. First, using superscript  $(i)$  to indicate  $i$  of  $N$  independent samples of the random variable,  $N$  as the given out-degree of a market, and  $T$  as the given boolean variable for successful disease transmission:

$$S_{C \rightarrow M} | T, N = \begin{cases} 0 & T = \text{False} \\ S_{M \rightarrow C}^{(1)} + S_{M \rightarrow C}^{(2)} + \dots + S_{M \rightarrow C}^{(N)} & T = \text{True}. \end{cases} \quad (2)$$

This bookkeeping equation results from following the instructions, “choose among all  $C \rightarrow M$  edges going to markets with out-degree  $N$  and add up the number of counties infected, assuming the market either is or is not infected.” The second observation is

$$S_{M \rightarrow C} | T, N = \begin{cases} 0 & T = \text{False} \\ 1 + S_{C \rightarrow M}^{(1)} + S_{C \rightarrow M}^{(2)} + \dots + S_{C \rightarrow M}^{(N)} & T = \text{True}. \end{cases} \quad (3)$$

In the next step, we achieve the desired generating functions on the right hand side:

$$\langle x^{S_{C \rightarrow M}} | N \rangle = (1 - \tau_C) + \tau_C H_{M,1}(x)^N \quad (4)$$

and

$$\langle x^{S_{M \rightarrow C}} | N \rangle = (1 - \tau_M) + \tau_M x H_{C,1}(x)^N, \quad (5)$$

where  $\tau_C$  and  $\tau_M$  are the probabilities that  $T = \text{True}$  in Eq. 2 and Eq. 3, respectively. Averaging each equation over the appropriate “excess degree” distribution for  $N$  gives the coupled system:

$$H_{C,1}(x) = (1 - \tau_C) + \tau_C G_{M,1}(H_{M,1}(x)) \quad (6a)$$

$$H_{M,1}(x) = (1 - \tau_M) + \tau_M x G_{C,1}(H_{C,1}(x)). \quad (6b)$$

These must be solved in order to obtain the distribution on the outbreak size starting in a randomly infected county, which is generated by  $H_{C,0}(x)$  and derived starting from the observation that

$$\langle x^{1+S_{C \rightarrow M}^{(1)}+S_{C \rightarrow M}^{(1)}+\dots+S_{C \rightarrow M}^{(N)}} | N \rangle = x H_{C,1}(x)^N. \quad (7)$$

The derivation is completed by averaging over the county out-degree distribution (*not* the county “excess degree” distribution) to obtain

$$H_{C,0}(x) = x G_{C,0}(H_{C,1}(x)). \quad (8)$$

The outbreak size and epidemic proportion calculations follow in the usual way. Let  $u = H_{C,1}(1)$  and  $v = H_{M,1}(1)$ . Using the  $u = v = 1$  solution to Eq. 6, the expected outbreak size reduces to

$$H'_{C,0}(1) = 1 + \frac{\tau_C \tau_M G'_{C,0}(1) G'_{M,1}(1)}{1 + \tau_C \tau_M G'_{C,0}(1) G'_{M,1}(1)}. \quad (9)$$

Numerically finding other solutions for  $u$  and  $v$ , with  $0 < u < 1$  and  $0 < v < 1$ , leads to the epidemic size proportion as

$$1 - H_{C,0}(1) = 1 - G_{C,0}(u). \quad (10)$$

To obtain Eqs. 4 through 6 in the main text, we assume that county out-degree is Poisson distributed with mean  $\lambda_C$  and that market in- and out-degree are perfectly correlated. Imperfect correlations could be included with an additional parameter.

## References

- [1] Newman M. Spread of epidemic disease on networks. *Physical Review E*. 2002;66(1):016128. doi: 10.1103/PhysRevE.66.016128.
- [2] Meyers LA, Newman MEJ, Martin M, Schrag S. Applying network theory to epidemics: Control measures for *Mycoplasma pneumoniae* outbreaks. *Emerging Infectious Diseases*. 2003;9(2):204–210. doi: 10.3201/eid0902.020188.

## S2 Text: Description of Data Release

**Note: The data release will coincide with publication of the report – the DOI given below will remain inactive until release.**

Representative sales data collected from several livestock market websites, as aggregated for the analyses in this report, are available for download from the Bansal Lab Dataverse [1]. Accompanying the data are scripts for R [2] that reproduce the results presented in the main text.

### **volume.csv**

---

**date** (char as YYYY-MM-DD) date of cattle auction given on each sale report  
**market** (int) unique market identifier  
**orig\_location** (char) FIPS code for county at market street address  
**dest\_location** (char) FIPS code for nearest county containing the origin city[, state]  
**head** (int) number of cattle in all lots (each defaults to 1 for missing data)

A disaggregated version of the representative sales data, sufficient to re-create the panels of Fig. 1 in the main text. Note that the first two characters of a FIPS code correspond to the state, allowing for in-state proportion calculations.

### **proportion.csv**

---

**year** (char) year of cattle auction  
**week** (char) ISO week of year  
**market** (int) unique market identifier  
**receipts** (int) total head sold at auction from sale report or [3] (if unreported)  
**head** (int) head given as representative sales (lot size defaults to 1 for missing data)  
**sales** (int) head in county-wide sales\*  
**inventory** (int) head in county-wide inventory\*  
**farms** (int) farms in county-wide inventory\*

The script **proportion.R** reads this file and fits a binomial family GLMM, associating the sampling probability for representative sales in each report with the covariates provided.

### **certificate.csv**

---

**orig** (char) State abbreviation for cattle origin  
**dest** (char) State abbreviation for cattle destination  
**rep\_sales** (int) Head from representative sales, (see Methods for time-span)  
**flows** (int) Head from certificate-derived data<sup>†</sup>

Note that the data from [5] are available in electronic form at <http://webarchives.cdlib.org/sw12j6951w/http://www.ers.usda.gov/Data/InterstateLivestockMovements/View.asp>. No script is provided to calculate the correlations between interstate rep\_sales and flows for each dest.

---

\*Reproduced for convenience from [4], without endorsement by the USDA.

†Reproduced for convenience from [5]

## edge.csv

---

**market** (char) year of cattle auction

**dest\_location** (char) FIPS code for nearest county containing the origin city[, state]

**sales** (int) head in county-wide sales

**inventory** (int) head in county-wide inventory

**farms** (int) farms in county-wide inventory

**distance** (real) great-circle distance between orig\_location and dest\_location county centroids<sup>‡</sup>

**head** (int) head given as representative sales (lot size defaults to 1 for missing data)

**instate** (bool) zero if and only if dest\_location and market are in different states

The script **edge.R** reads this file and fits a zero-inflated negative-binomial family GLM, associating a zero-inflation probability and mean head of cattle for each county-market pair with the covariates provided. The script additionally simulates counts for each pair, with the same random seed used in this report, and writes the counts to a new file.

## References

- [1] Carroll, IT, Bansal S. Replication Data for: Livestock market data for modeling disease spread among US cattle. Harvard Dataverse 2015. Available from: <http://dx.doi.org/10.7910/DVN/MAXZAY>.
- [2] R Core Team. R: A Language and Environment for Statistical Computing. Vienna, Austria; 2015. Available from: <http://www.r-project.org>.
- [3] USDA\AMS. Livestock, Poultry, and Grain Market News;. Available from: <http://www.ams.usda.gov/AMSV1.0/LPSMarketNewsPage>.
- [4] USDA\NASS. 2012 Census of Agriculture; 2015. Available from: <ftp://ftp.nass.usda.gov/quickstats/qs.census2012.txt.gz>.
- [5] Shields DA, Mathews KH. Interstate Livestock Movements. USDA:ERS; 2003. Available from: [http://www.ers.usda.gov/media/312234/ldpm10801\\_1\\_.pdf](http://www.ers.usda.gov/media/312234/ldpm10801_1_.pdf).
- [6] County-to-County Distance Matrix; 2011. Available from: <http://cta.ornl.gov/transnet/SkimTree.htm>.

---

<sup>‡</sup>Reproduced for convenience from [6]
